# Supplementary material for: Hydrocarbon blend membranes with suppressed chemical crossover for redox flow batteries
Source: Royal Society of Chemistry journal article supplement (doi:10.1039/c2ra20668d), 2012-01-01
Supplement: c2ra20668d.pdf [file c2ra20668d.pdf]

## Electronic Supplementary Information for Hydrocarbon blend membranes with suppressed chemical crossover for redox flow batteries

Xinsheng Zhao, Yongzhu Fu, Wei Li, and Arumugam Manthiram\*

Materials Science and Engineering Program and Texas Material Institute  
The University of Texas at Austin, Austin, TX 78712, United States  
Fax: 1-512-471-7681, Tel: 1-512-471-1791, E-mail: rmanth@mail.utexas.edu (A. Manthiram)

### Experimental details

#### *Materials synthesis and membrane preparation*

The details of preparation of SPEEK and PSf-ABIm are available elsewhere.<sup>1</sup> 15 g of PEEK (Victrex) were dissolved in 750 mL of concentrated sulfuric acid (Fisher Scientific), vigorously stirred at room temperature for 55 h, and gradually transferred into a large volume of ice-cold water under mechanical agitation. The polymer precipitate was filtered, washed thoroughly with large amount of deionized water until the pH was neutral, and dried at 100 °C overnight.

The synthesis of PSf-ABIm was carried out by a condensation reaction between carboxylated polysulfone and 2-amino-benzimidazole (ABIm) using triphenylphosphite as a dehydration agent at 100 °C for 3 h to form the amide unit. Lithium chloride was used to enhance the dissolution of the reactants and product in dimethylformamide. The formation of PSf-ABIm was confirmed by the absorption bands in the FT-IR spectra at 3400 and 1630 cm<sup>-1</sup>, corresponding, respectively, to isolated N–H stretching and C=N stretching.

The plain SPEEK and SPEEK/PSf-ABIm blend membranes were prepared by casting the N,N-dimethylacetamide solution of SPEEK or SPEEK+PSf-ABIm (5 wt. % PSf-ABIm) polymers on a glass plate and drying at 65 °C overnight then at 100 °C in a vacuum oven for 24 h.

#### *Ion exchange capacity and water uptake*

The ion exchange capacities (IECs) and water uptake of the plain SPEEK and SPEEK/PSf-ABIm blend membranes were determined as below.<sup>2</sup> The ion exchange capacities (IECs) of the plain SPEEK and SPEEK/PSf-ABIm blend membranes were determined by suspending the vacuum-dried membranes (~ 0.2 g) in 1.0 M NaCl solution (50 ml) for 24 h to liberate the H<sup>+</sup> ions and then titrating with standardized 0.05 M NaOH solution (Fisher Scientific) using phenolphthalein as an indicator. Finally, the IEC was calculated as

$$\text{IEC} = \frac{\Delta V_{\text{NaOH}} \cdot C_{\text{NaOH}}}{W_{\text{dry}}} \quad (1)$$

where  $\Delta V_{\text{NaOH}}$  is the consumed volume of NaOH solution,  $C_{\text{NaOH}}$  is the concentration of NaOH solution, and  $W_{\text{dry}}$  is the dried weight of the membrane.

Equilibrium water uptake of the membranes was determined at room temperature by measuring the weights of the dry membrane ( $W_{\text{dry}}$ ) and the wet membrane ( $W_{\text{wet}}$ ) as

$$W_{\text{uptake}} = \frac{(W_{\text{wet}} - W_{\text{dry}})}{W_{\text{dry}}} \times 100\% \quad (2)$$

### **Membrane area resistance**

The area resistance measurements were conducted on an impedance analyzer (1260 FRA, Solartron Analytical) combined with a potentiostat (1287, Solartron Analytical). The amplitude of the sinusoidal signal for AC impedance was set as 10 mV rms over a frequency range of 7 kHz to 1 Hz. A solution of 1.0 M VOSO<sub>4</sub> in 2.0 M H<sub>2</sub>SO<sub>4</sub> was fed to both sides of the membrane. The effective membrane area was 5 cm<sup>2</sup>.

### **Mechanical strength**

The stress–strain behavior of the membrane was measured with an Instron 5966 tension tester at room temperature. All samples were kept in de-ionized water for 24 h before the test to ensure they were saturated with water.

### **Chemical stability**

The chemical stability of plain SPEEK and SPEEK/PSf-ABIm blend membranes were evaluated by scanning electron microscopy (SEM) after immersing the membranes in a solution of 1.0 M charged vanadium (VO<sub>2</sub>)<sup>+</sup> electrolyte in 2.0 M H<sub>2</sub>SO<sub>4</sub> at room temperature for 2 and 100 days.

### **Vanadium permeability**

The concentration of (VO)<sup>2+</sup> ions permeated through the membrane was determined according to the literature procedure.<sup>3</sup> The left cell was filled with 1.0 M VOSO<sub>4</sub> in 2.0 M H<sub>2</sub>SO<sub>4</sub> solution, while the right cell was filled with 1.0 M MgSO<sub>4</sub> in 2.0 M H<sub>2</sub>SO<sub>4</sub> solution to equalize the ionic strengths and to minimize the osmotic pressure effect. The concentration of (VO)<sup>2+</sup> in a sample solution collected from the right cell was measured with an UV–vis spectrometer (Cary 5000).

### **VRB single cell performance**

A membrane was sandwiched with two graphitic carbon felt electrodes and was clamped by two graphite polar plates with straight flow channels. 1.0 M V<sup>2+</sup>/V<sup>3+</sup> in 2.0 M H<sub>2</sub>SO<sub>4</sub> solution and 1.0 M (VO)<sup>2+</sup>/(VO<sub>2</sub>)<sup>+</sup> in 2.0 M H<sub>2</sub>SO<sub>4</sub> solution, serving as negative and positive electrolytes, respectively, were circulated through the corresponding half-cell. The active area of the single cell was 5 cm<sup>2</sup> and the volume of the electrolyte solution was 20 mL for each half-cell. Charge–discharge cycling tests were conducted with an Arbin BT 2000 battery cyclor (Arbin instruments). A maximum voltage of 1.7 V and a minimum voltage of 0.8 V for charge and discharge were employed to avoid the corrosion of carbon felts and graphite plates.

### **References:**

1. Y. Z. Fu, A. Manthiram, M. D. Guiver, *Electrochem. Commun.*, 2007, **9**, 905–910.
2. X. G. Teng, Y. T. Zhao, J.Y. Xia, Z. H. Wu, X. P. Qiu, L. Q. Chen, *J. Membr. Sci.*, 2009, **341**, 149–154.
3. Q. T. Luo, H. M. Zhang, J. Chen, P. Qian, Y. F. Zhai, *J. Membr. Sci.*, 2008, **311**, 98–103.
